# Supplementary material for: A Water-Soluble Leggero Pillar[5]arene
Source: MDPI journal article supplement (doi:10.3390/molecules27196259), 2022-09-23
Supplement: s1 [file s1]

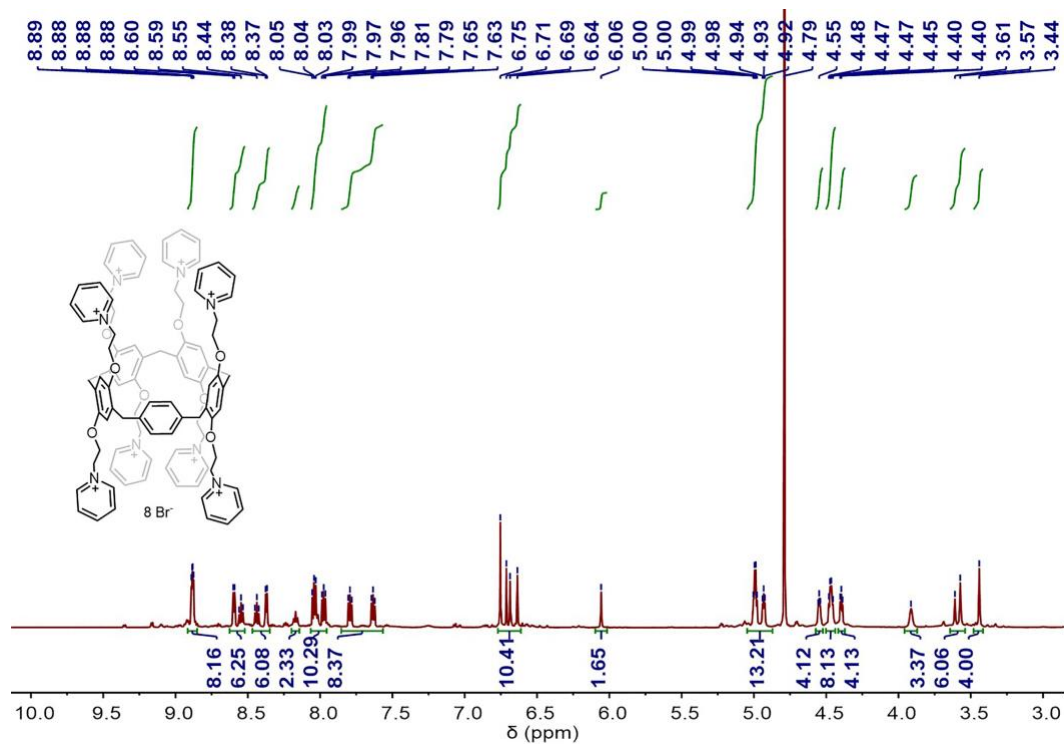

**Figure S1.** <sup>1</sup>H NMR spectrum (600 MHz, 298 K, D<sub>2</sub>O) of CWP[5]L.

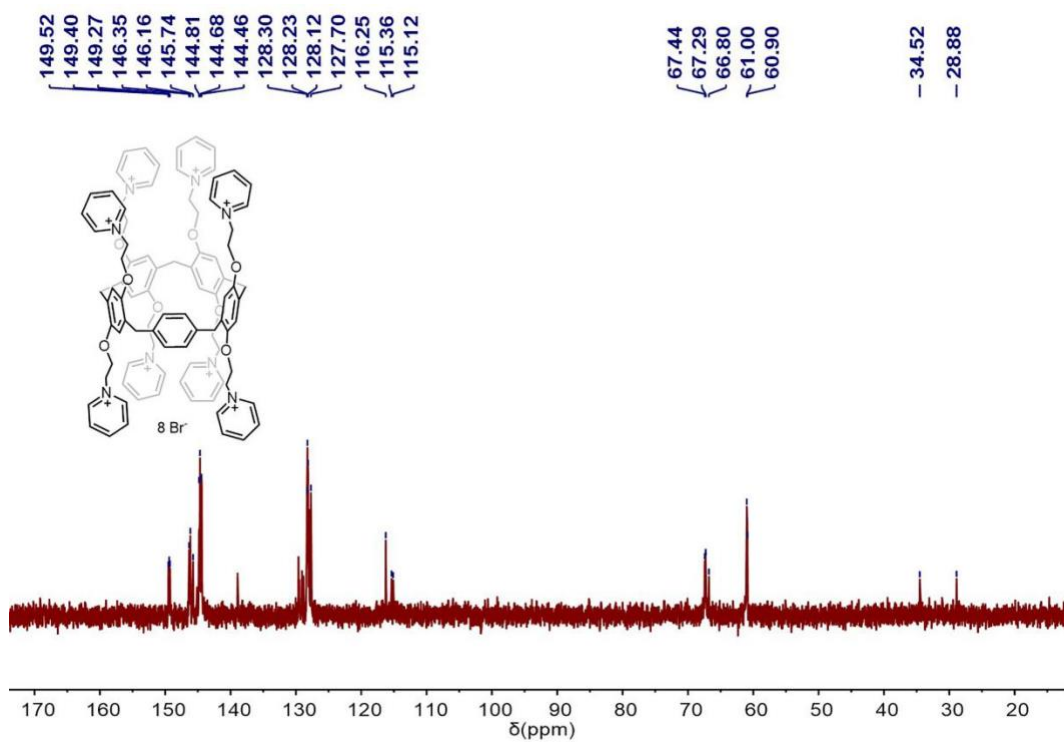

**Figure S2.** <sup>13</sup>C NMR spectrum (101 MHz, 298 K, D<sub>2</sub>O) of CWP[5]L.

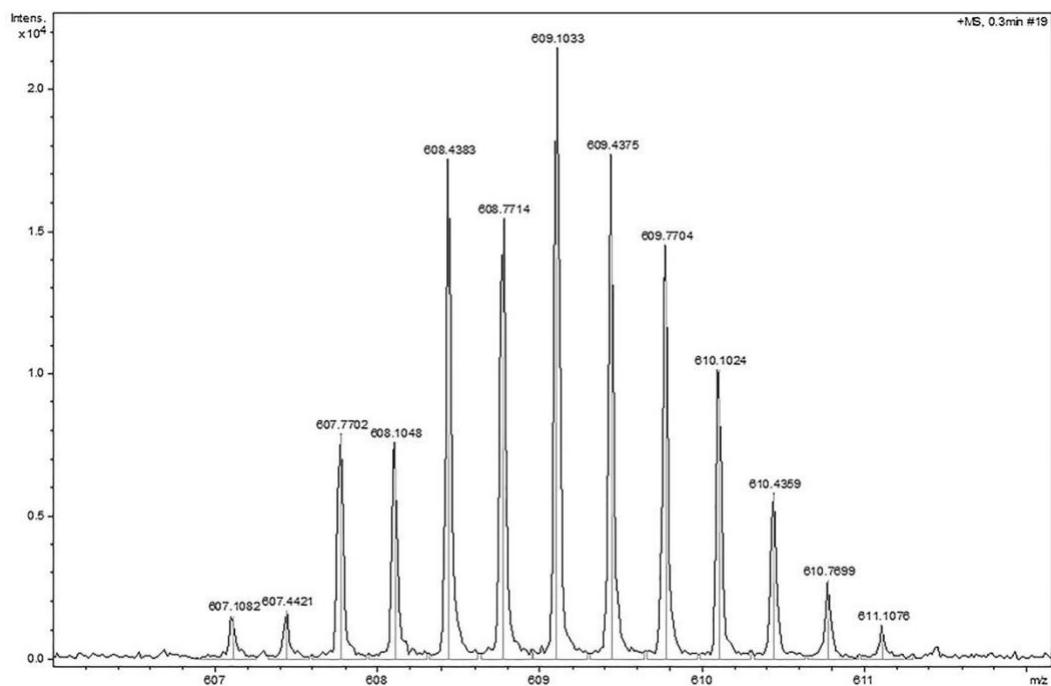

**Figure S3.** HRMS (ESI) spectrum of **CWP[5]L**.

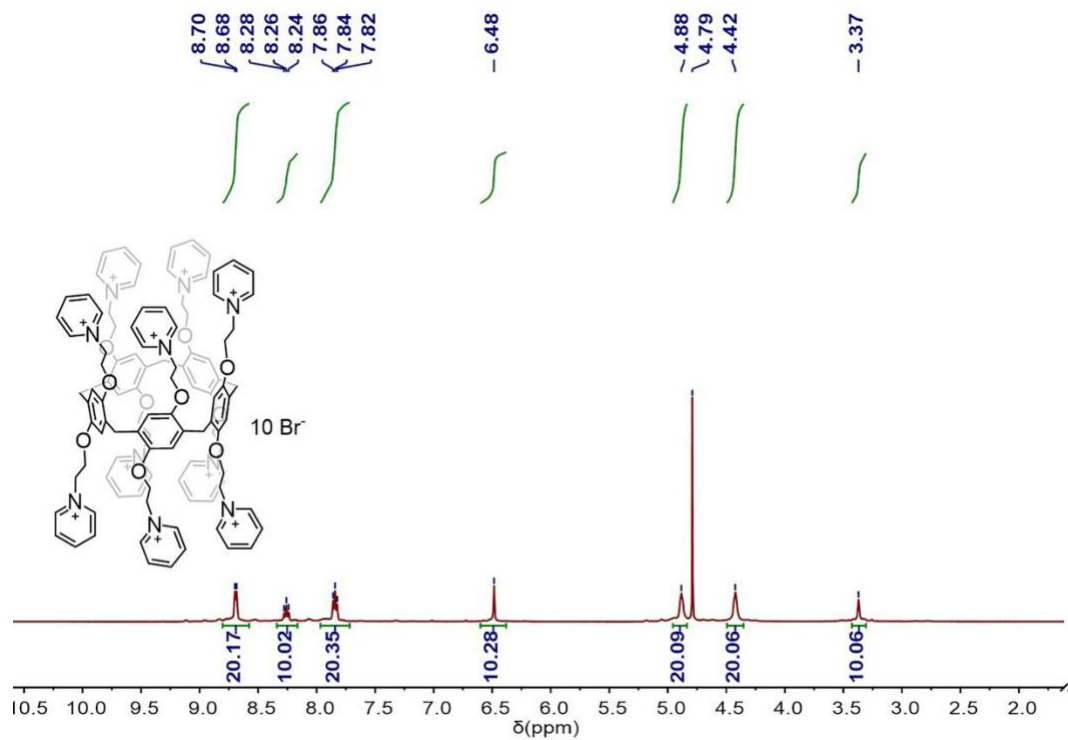

**Figure S4.**  $^1\text{H}$  NMR spectrum (400 MHz, 298 K,  $\text{D}_2\text{O}$ ) of **CWP[5]A**.

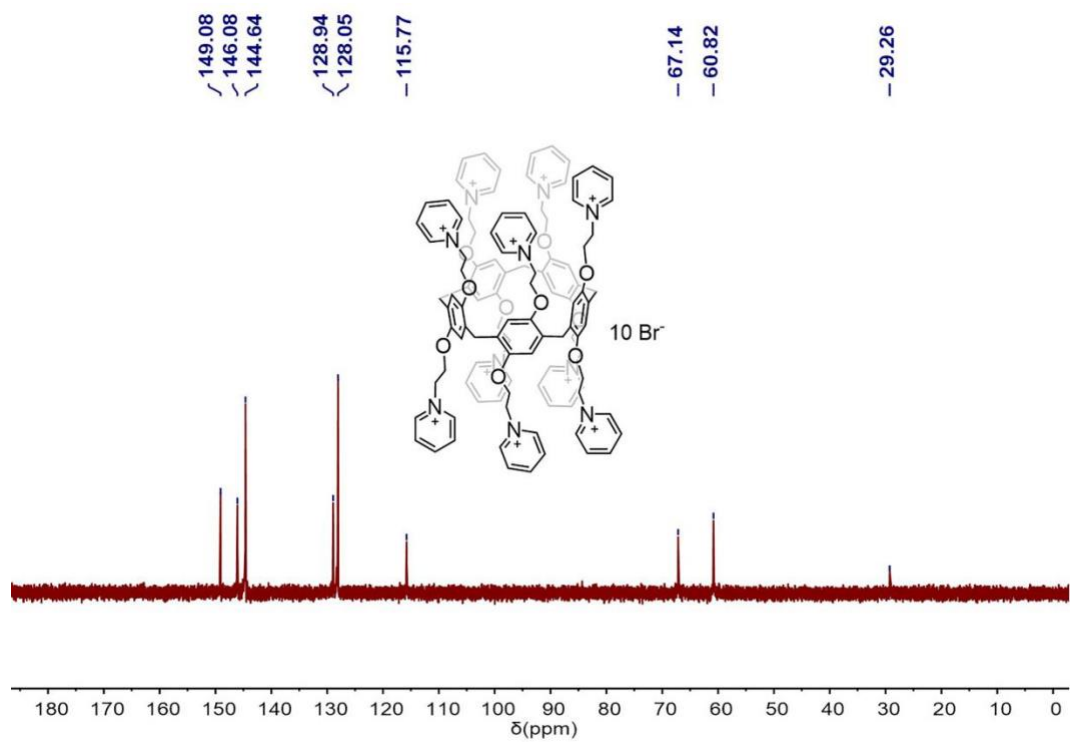

**Figure S5.** <sup>13</sup>C NMR spectrum (101 MHz, 298 K, D<sub>2</sub>O) of CWP[5]A.

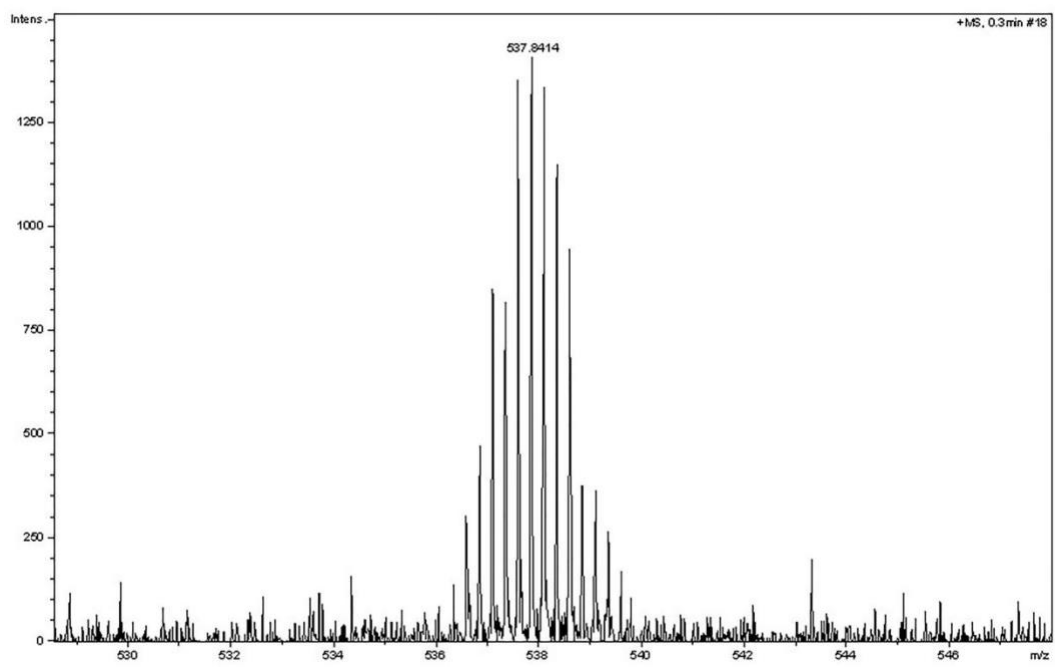

**Figure S6.** HRMS (ESI) spectrum of CWP[5]A.

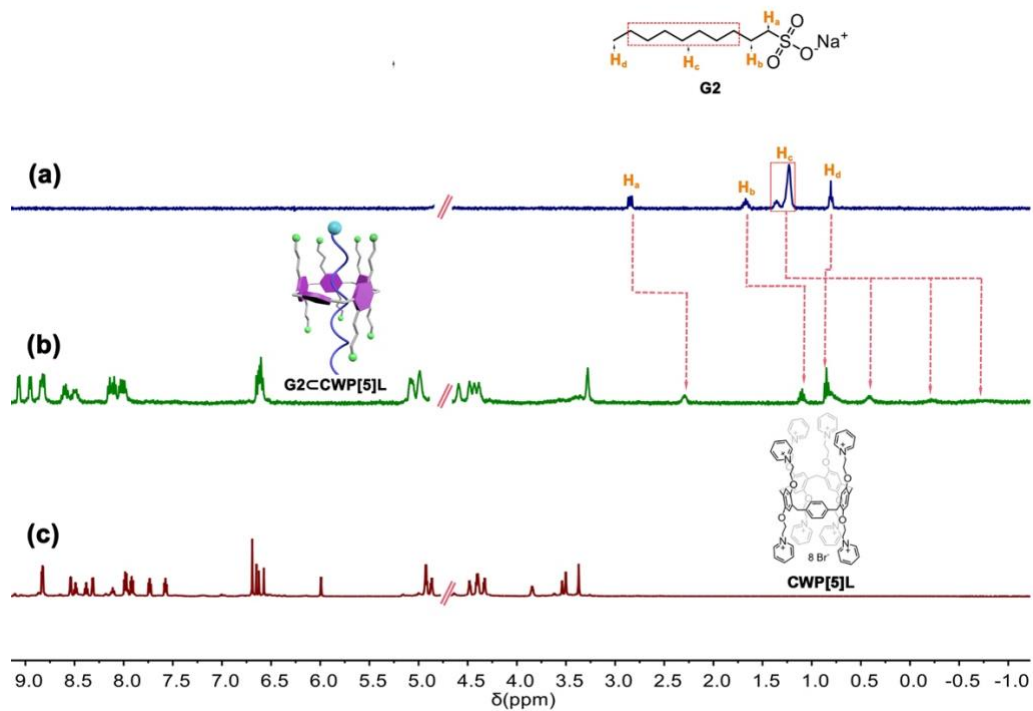

**Figure S7.** (a)  $^1\text{H}$  NMR spectra (400 MHz, 298 K,  $\text{D}_2\text{O}$ ) of (a) **G2**, (b) **CWP[5]L + G2** and (c) **CWP[5]L**. Concentrations of host and guest are all 4.0 mM.

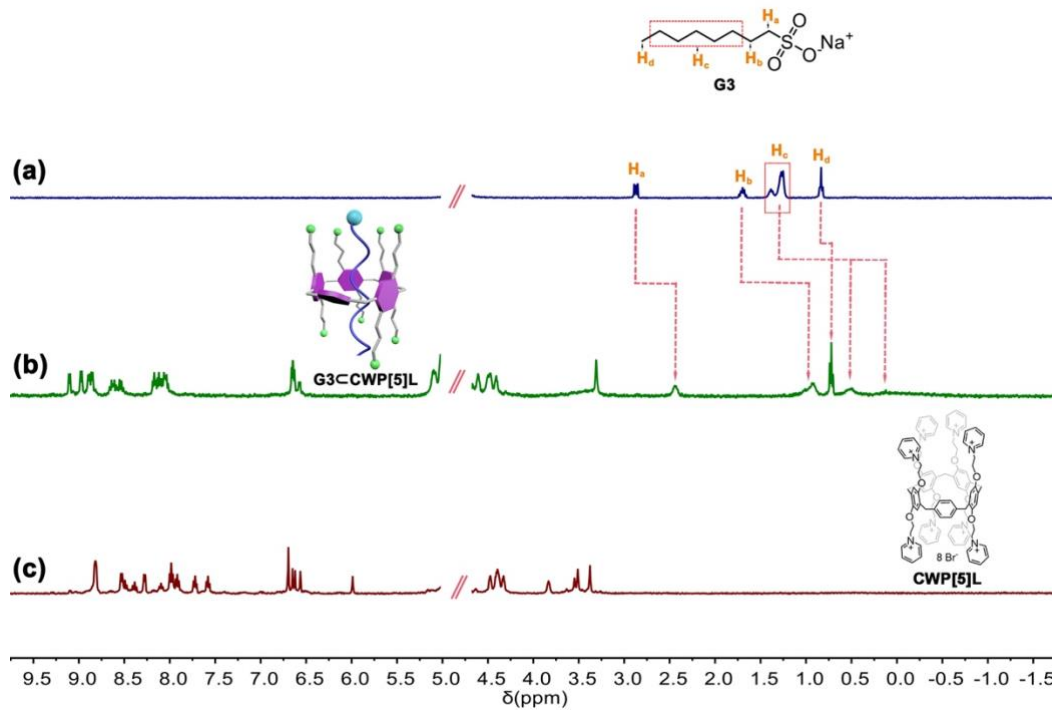

**Figure S8.** (a)  $^1\text{H}$  NMR spectra (400 MHz, 298 K,  $\text{D}_2\text{O}$ ) of (a) **G3**, (b) **CWP[5]L + G3** and (c) **CWP[5]L**. Concentrations of host and guest are all 4.0 mM.

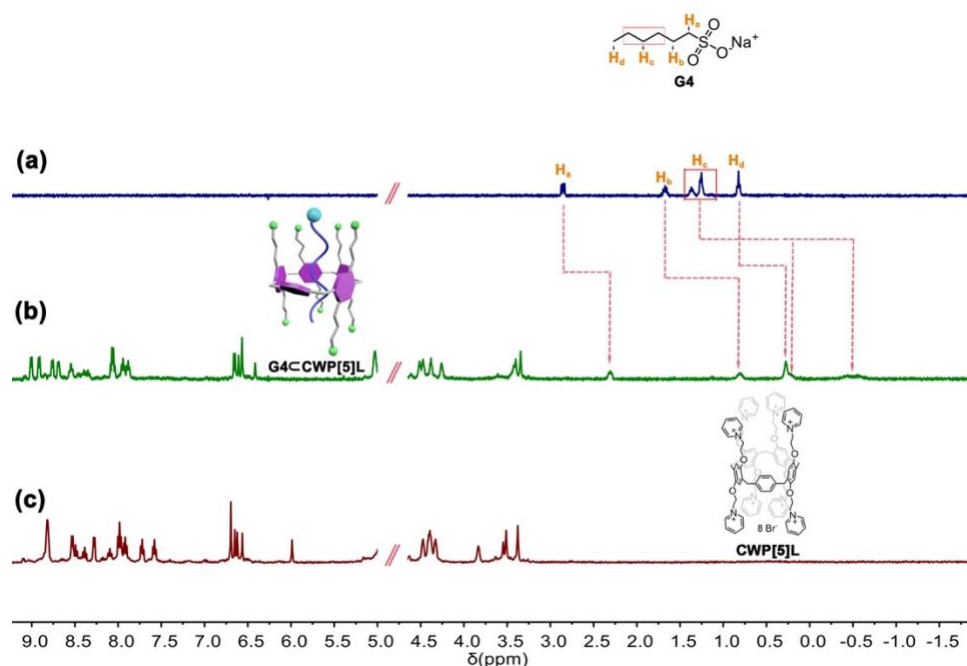

**Figure S9.** (a)  $^1\text{H}$  NMR spectra (400 MHz, 298 K,  $\text{D}_2\text{O}$ ) of (a) **G4**, (b) **CWP[5]L** + **G4** and (c) **CWP[5]L**. Concentrations of host and guest are all 4.0 mM.

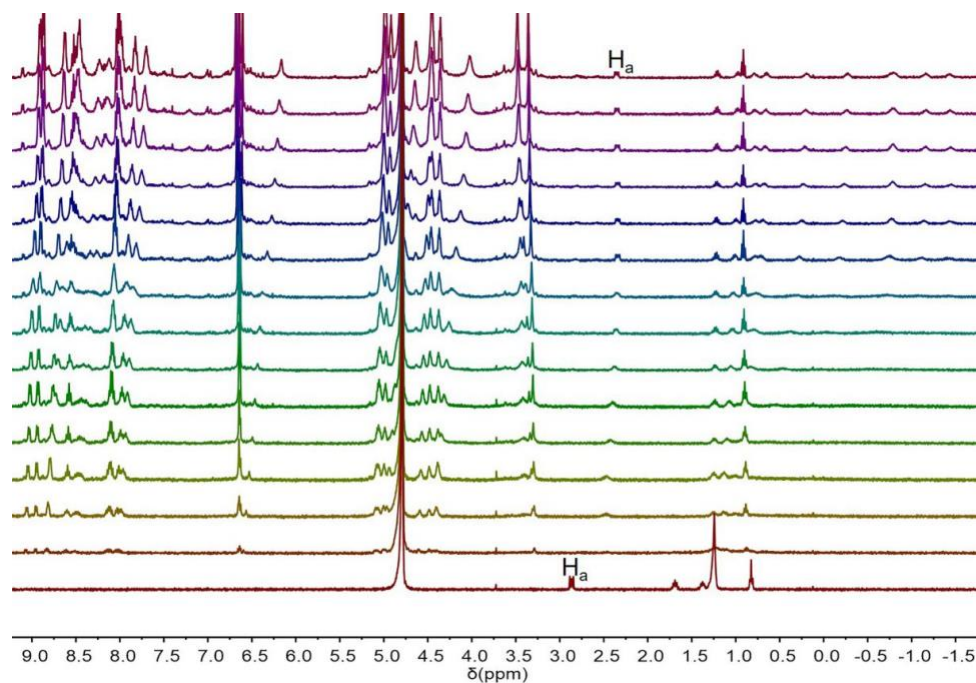

**Figure S10.** Partial  $^1\text{H}$  NMR spectra (400 MHz,  $\text{D}_2\text{O}$ , 293 K) of **G1** at a concentration of 1 mM upon titration of **CWP[5]L**. From bottom to top, the concentration of **CWP[5]L** was 0, 0.25, 0.50, 0.75, 1.00, 1.25, 1.50, 1.75, 2.00, 2.50, 3.00, 3.50, 4.00, 4.50 and 5.00 mM, respectively.



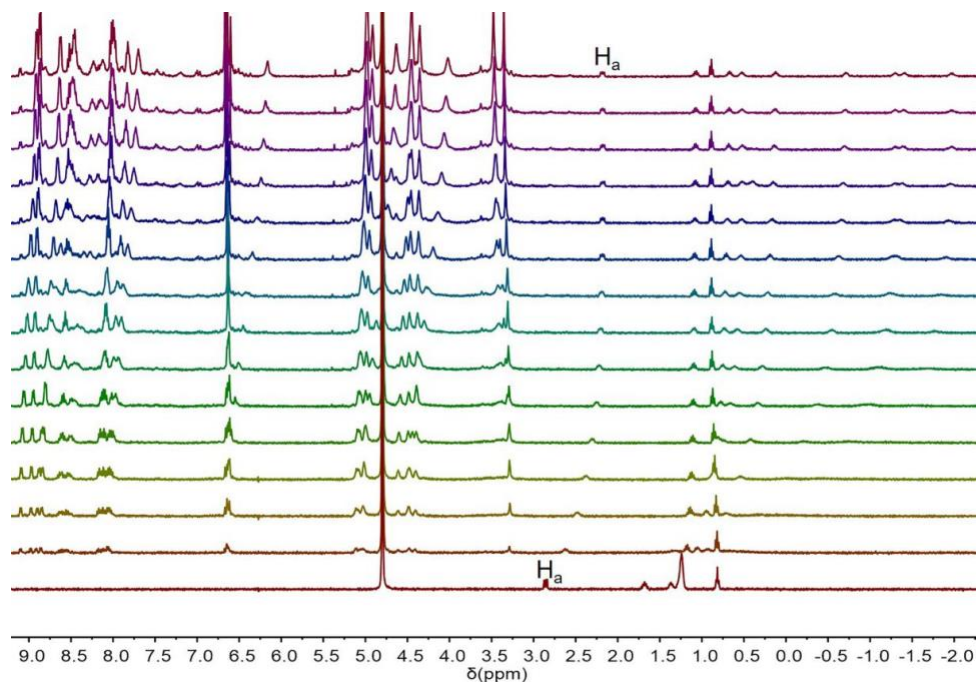

**Figure S11.** Partial  $^1\text{H}$  NMR spectra (400 MHz,  $\text{D}_2\text{O}$ , 293 K) of **G2** at a concentration of 1 mM upon titration of **CWP[5]L**. From bottom to top, the concentration of **CWP[5]L** was 0, 0.25, 0.50, 0.75, 1.00, 1.25, 1.50, 1.75, 2.00, 2.50, 3.00, 3.50, 4.00, 4.50 and 5.00 mM, respectively.

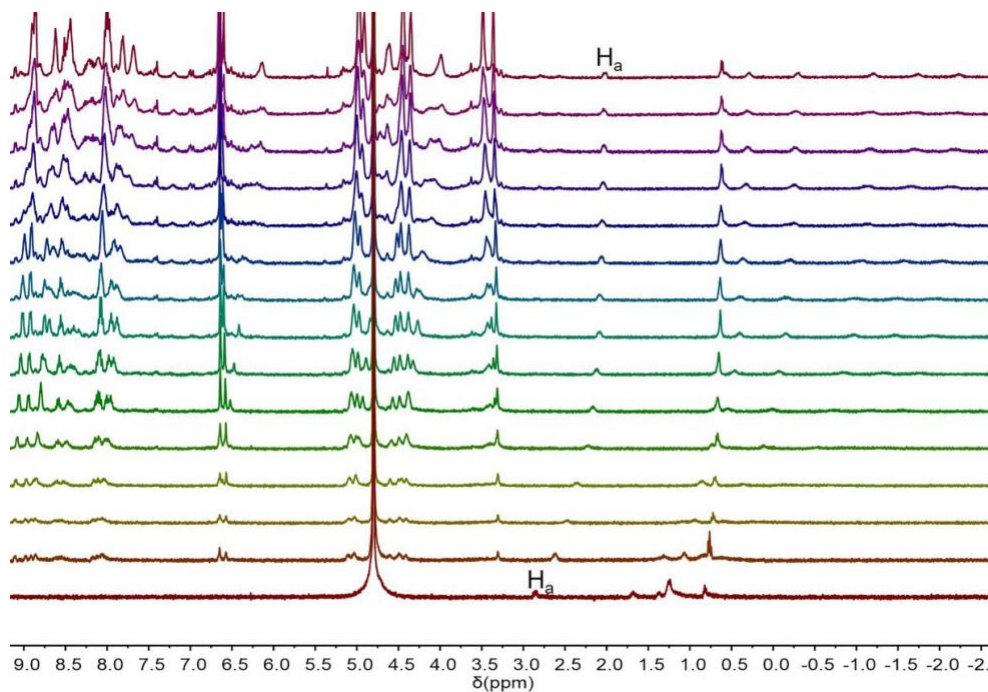

**Figure S12.** Partial  $^1\text{H}$  NMR spectra (400 MHz,  $\text{D}_2\text{O}$ , 293 K) of **G3** at a concentration of 1 mM upon titration of **CWP[5]L**. From bottom to top, the concentration of **CWP[5]L** was 0, 0.25, 0.50, 0.75, 1.00, 1.25, 1.50, 1.75, 2.00, 2.50, 3.00, 3.50, 4.00, 4.50 and 5.00 mM, respectively.

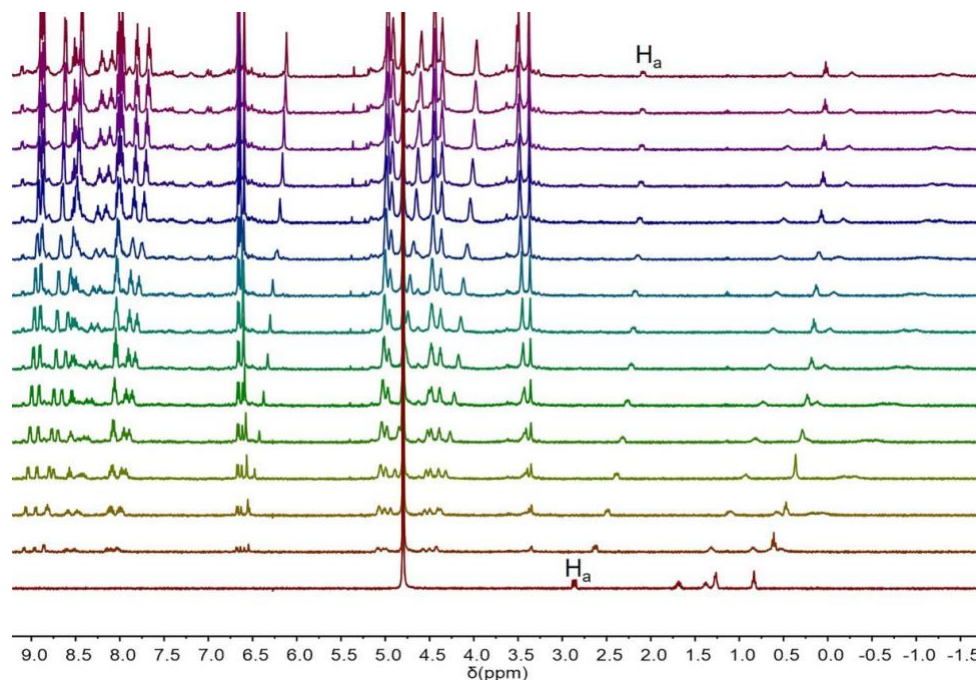

**Figure S13.** Partial  $^1\text{H}$  NMR spectra (400 MHz,  $\text{D}_2\text{O}$ , 293 K) of **G4** at a concentration of 1 mM upon titration of **CWP[5]L**. From bottom to top, the concentration of **CWP[5]L** was 0, 0.25, 0.50, 0.75, 1.00, 1.25, 1.50, 1.75, 2.00, 2.50, 3.00, 3.50, 4.00, 4.50 and 5.00 mM, respectively.

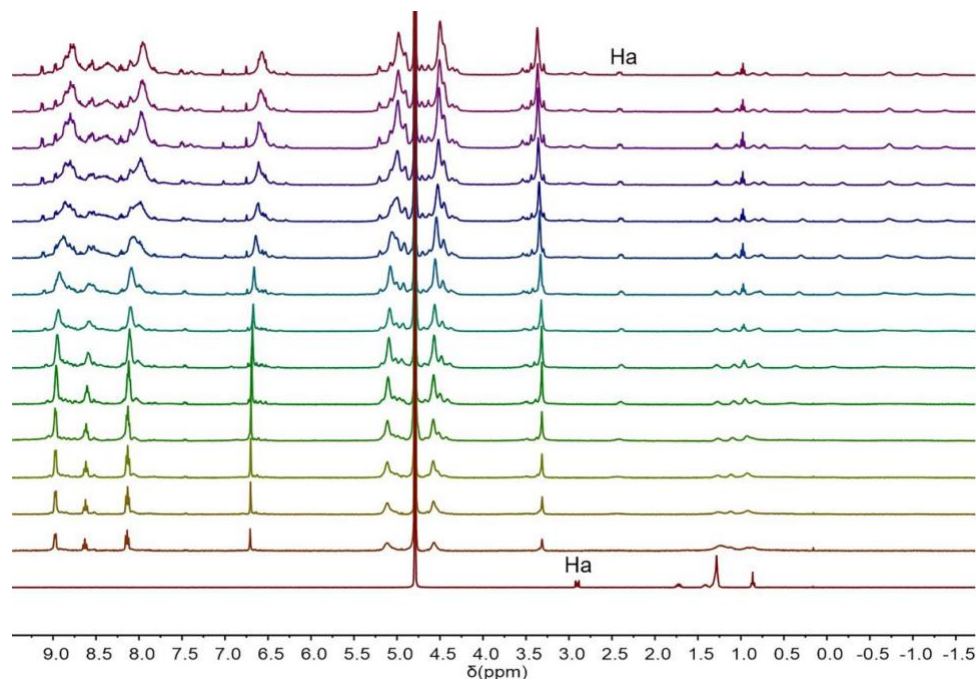

**Figure S14.** Partial  $^1\text{H}$  NMR spectra (400 MHz,  $\text{D}_2\text{O}$ , 293 K) of **G1** at a concentration of 1 mM upon titration of **CWP[5]A**. From bottom to top, the concentration of **CWP[5]A** was 0, 0.25, 0.50, 0.75, 1.00, 1.25, 1.50, 1.75, 2.00, 2.50, 3.00, 3.50, 4.00, 4.50 and 5.00 mM, respectively.

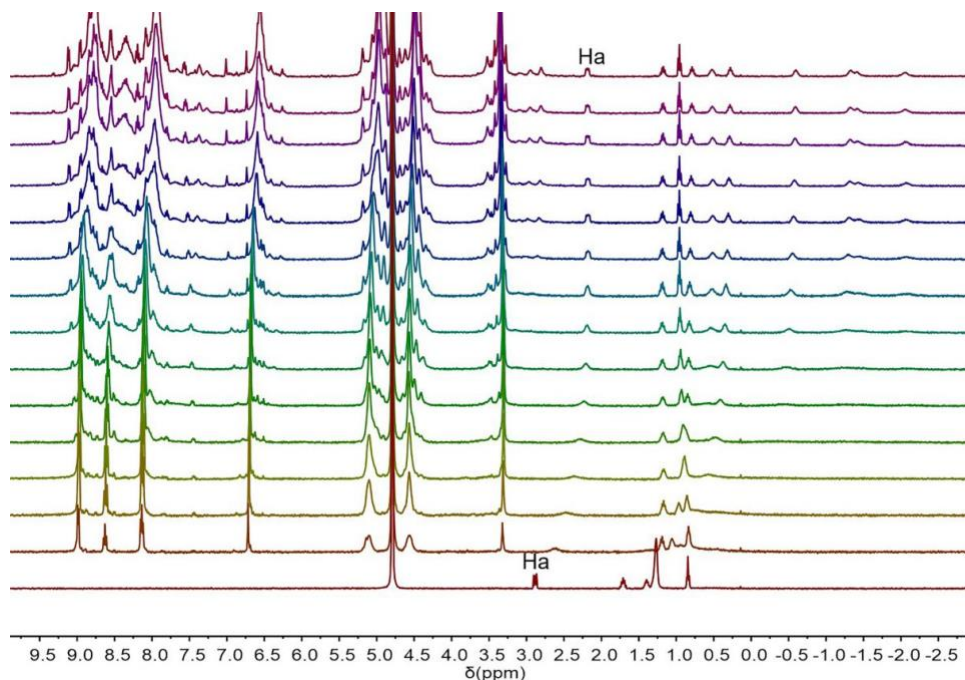

**Figure S15.** Partial  $^1\text{H}$  NMR spectra (400 MHz,  $\text{D}_2\text{O}$ , 293 K) of **G2** at a concentration of 1 mM upon titration of **CWP[5]A**. From bottom to top, the concentration of **CWP[5]A** was 0, 0.25, 0.50, 0.75, 1.00, 1.25, 1.50, 1.75, 2.00, 2.50, 3.00, 3.50, 4.00, 4.50 and 5.00 mM, respectively.

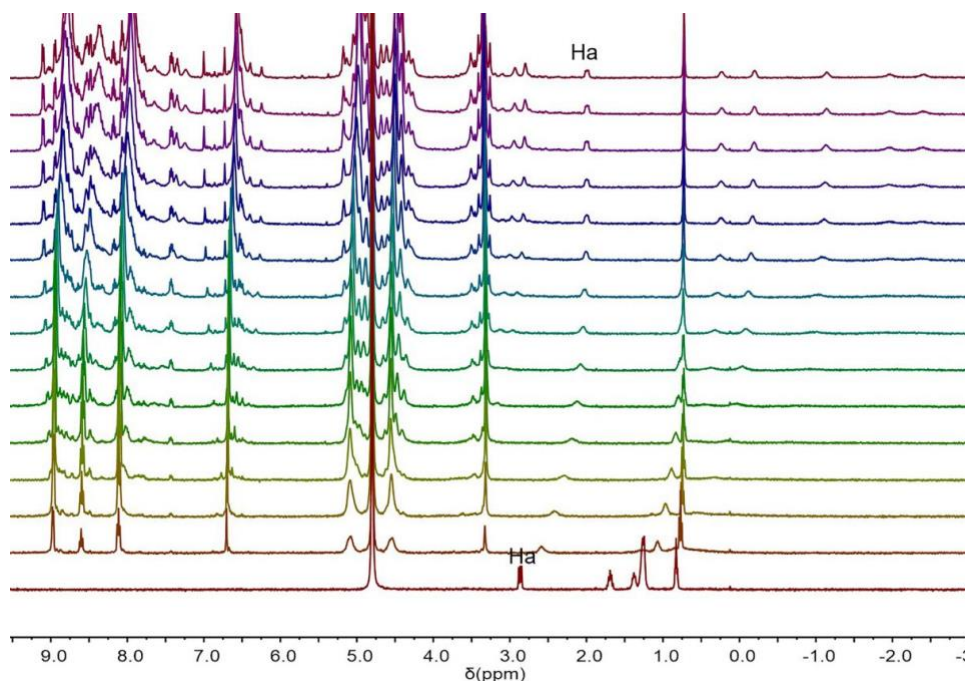

**Figure S16.** Partial  $^1\text{H}$  NMR spectra (400 MHz,  $\text{D}_2\text{O}$ , 293 K) of **G3** at a concentration of 1 mM upon titration of **CWP[5]A**. From bottom to top, the concentration of **CWP[5]A** was 0, 0.25, 0.50, 0.75, 1.00, 1.25, 1.50, 1.75, 2.00, 2.50, 3.00, 3.50, 4.00, 4.50 and 5.00 mM, respectively.



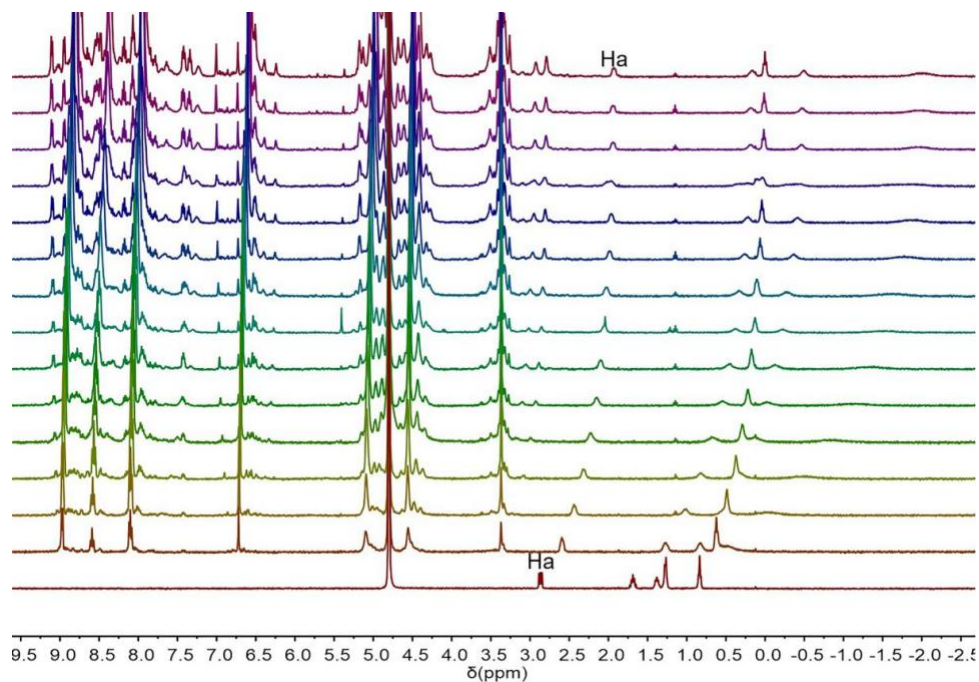

**Figure S17.** Partial  $^1\text{H}$  NMR spectra (400 MHz,  $\text{D}_2\text{O}$ , 293 K) of **G4** at a concentration of 1 mM upon titration of **CWP[5]A**. From bottom to top, the concentration of **CWP[5]A** was 0, 0.25, 0.50, 0.75, 1.00, 1.25, 1.50, 1.75, 2.00, 2.50, 3.00, 3.50, 4.00, 4.50 and 5.00 mM, respectively.
